# Supplementary material for: Metatranscriptomic reconstruction reveals RNA viruses with the potential to shape carbon cycling in soil
Source: PubMed Central journal article supplement — Proc Natl Acad Sci U S A. 2019 Nov 26;116(51):25900–8. doi: 10.1073/pnas.1908291116 (PMC6926006; doi:10.1073/pnas.1908291116), 2019-11-26
Supplement: pnas.1908291116.sapp.pdf [file pnas.1908291116.sapp.pdf]

## Supplementary Information for

### **Metatranscriptomic reconstruction reveals RNA viruses with the potential to shape carbon cycling in soil**

Evan P. Starr<sup>1</sup>, Erin E. Nuccio<sup>2</sup>, Jennifer Pett-Ridge<sup>2</sup>, Jillian F. Banfield<sup>\*3,4,5,6,7</sup> and Mary K. Firestone<sup>\*4,5</sup>

<sup>1</sup>Department of Plant and Microbial Biology, University of California, Berkeley, CA, USA

<sup>2</sup>Physical and Life Sciences Directorate, Lawrence Livermore National Laboratory, Livermore, CA, USA

<sup>3</sup>Department of Earth and Planetary Science, University of California, Berkeley, CA, USA

<sup>4</sup>Earth Sciences Division, Lawrence Berkeley National Laboratory, Berkeley, CA, USA

<sup>5</sup>Department of Environmental Science, Policy, and Management, University of California, Berkeley, CA, USA

<sup>6</sup>Chan Zuckerberg Biohub, San Francisco, CA, USA

<sup>7</sup>Innovative Genomics Institute, Berkeley, CA, USA

\*These authors share senior authorship

Jillian F. Banfield and Mary K. Firestone

Email: : [jbanfield@berkeley.edu](mailto:jbanfield@berkeley.edu) and [mkfstone@berkeley.edu](mailto:mkfstone@berkeley.edu)

#### **This PDF file includes:**

Figs. S1 to S11

#### **Other supplementary materials for this manuscript include the following:**

Datasets S1 to S6

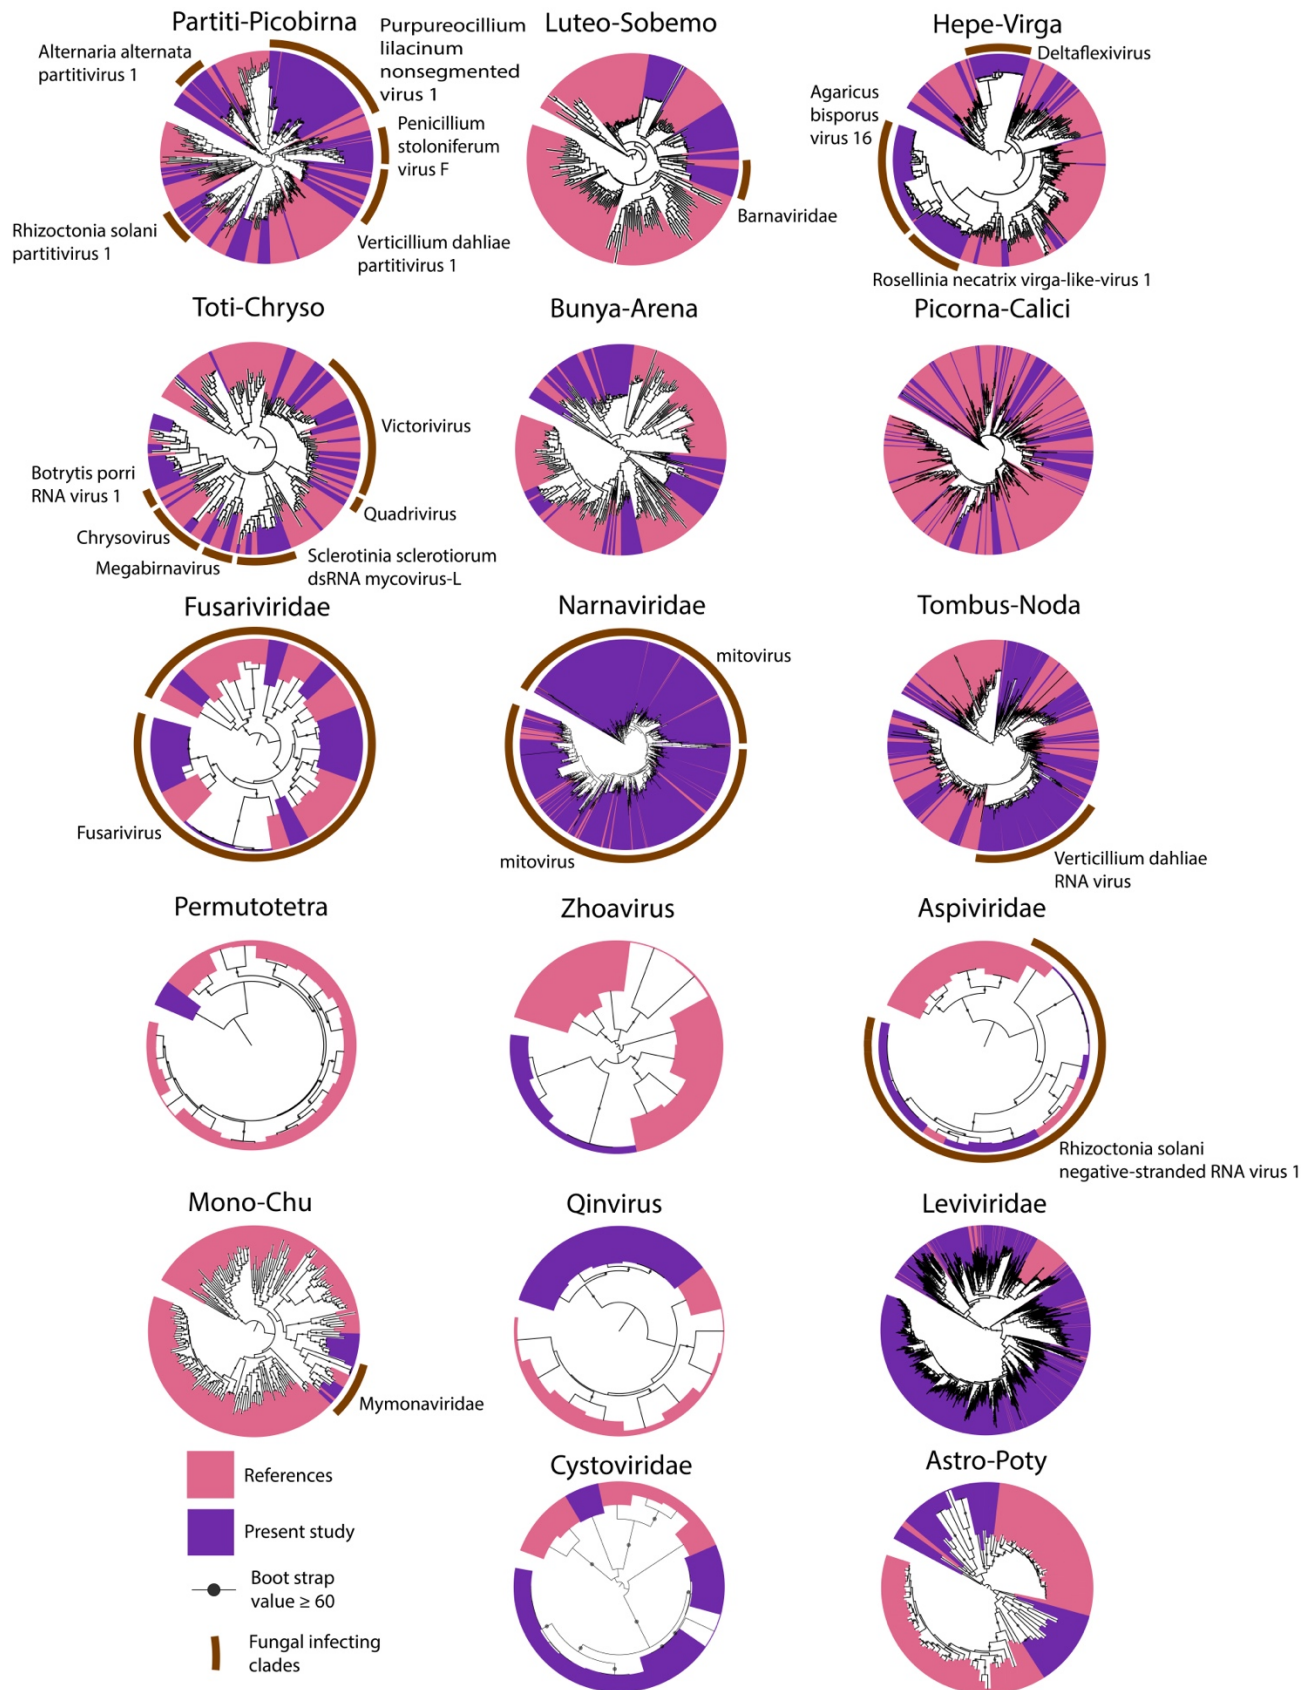

**Supplementary Figure 1.** Trees from Figure 1 with expected fungal infecting clades highlighted in brown. Each predicted fungal infecting clade is labelled with the name of the clade or the name of a well-studied representative virus if the clade is unnamed.

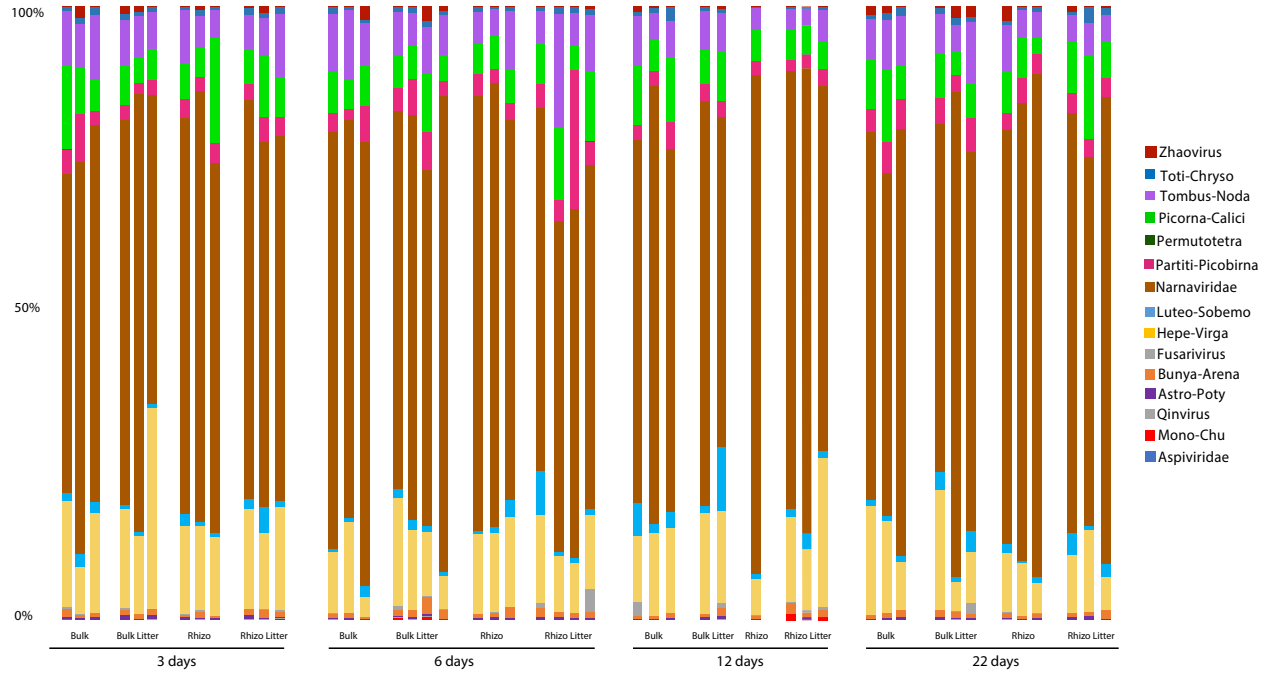

**Supplementary Figure 2.** Percent relative abundance of each eukaryotic RNA viral clade across samples.

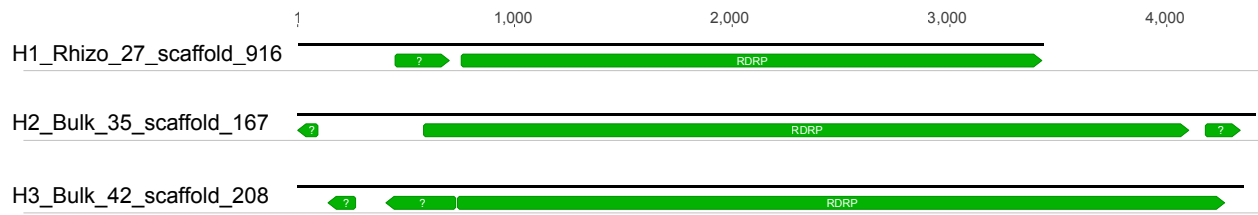

**Supplementary Figure 3.** Representative genome organization identified in some mitoviral genomes.

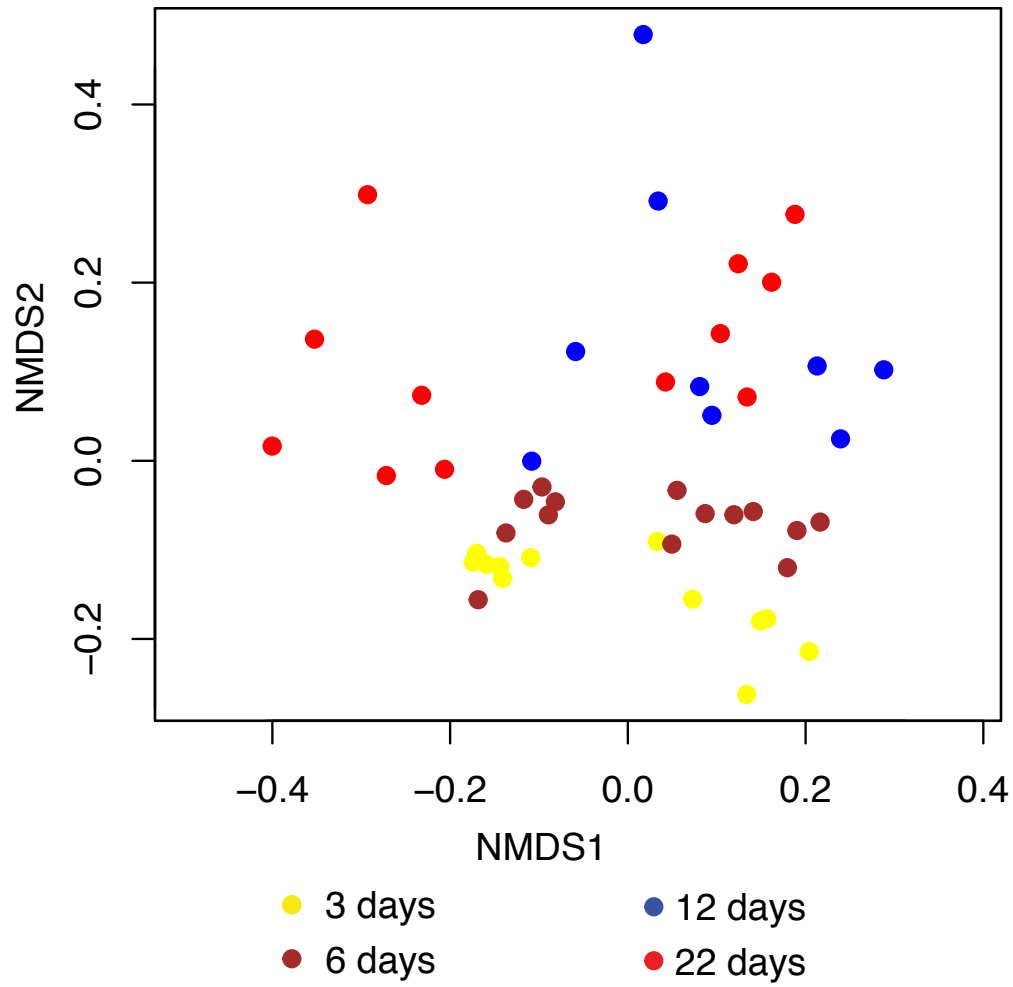

**Supplementary Figure 4.** Nonmetric multidimensional scaling ordination of eukaryotic communities based on Cox1 gene coverage (with plant sequences removed) colored by harvest day.

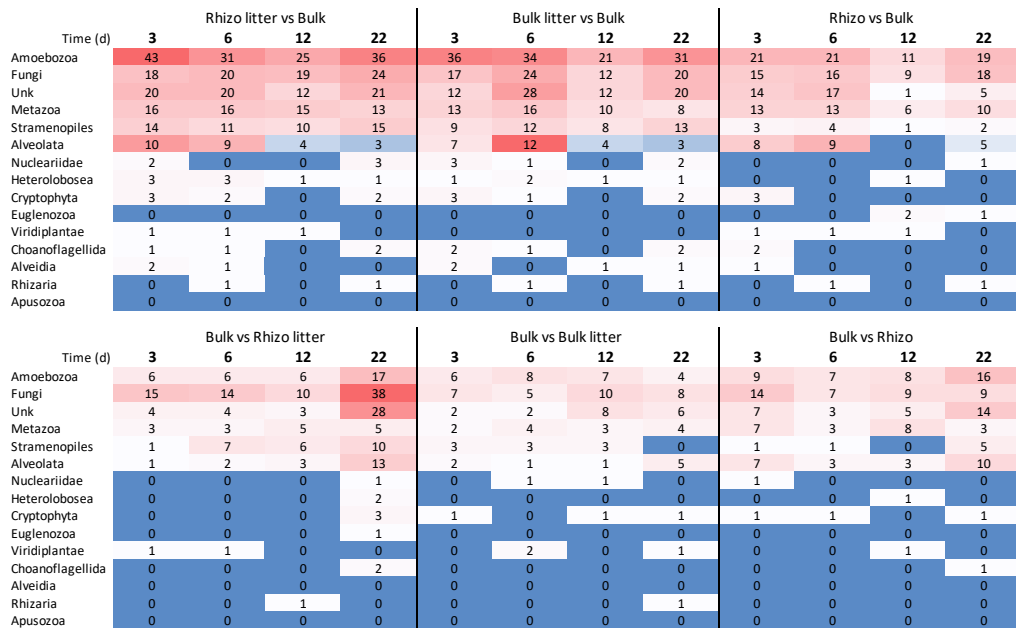

**Supplementary Figure 5.** Time-series heatmap representing the enriched clades of eukaryotes. The enrichment was determined by comparing the Cox1 transcript level of the treatments against the bulk soil (A) and the bulk soil against the treatments (B). Red indicates a higher number of identified significant enrichments and blue indicates no species were significantly enriched. The clades of eukaryotes are ordered by the total number of species identified.

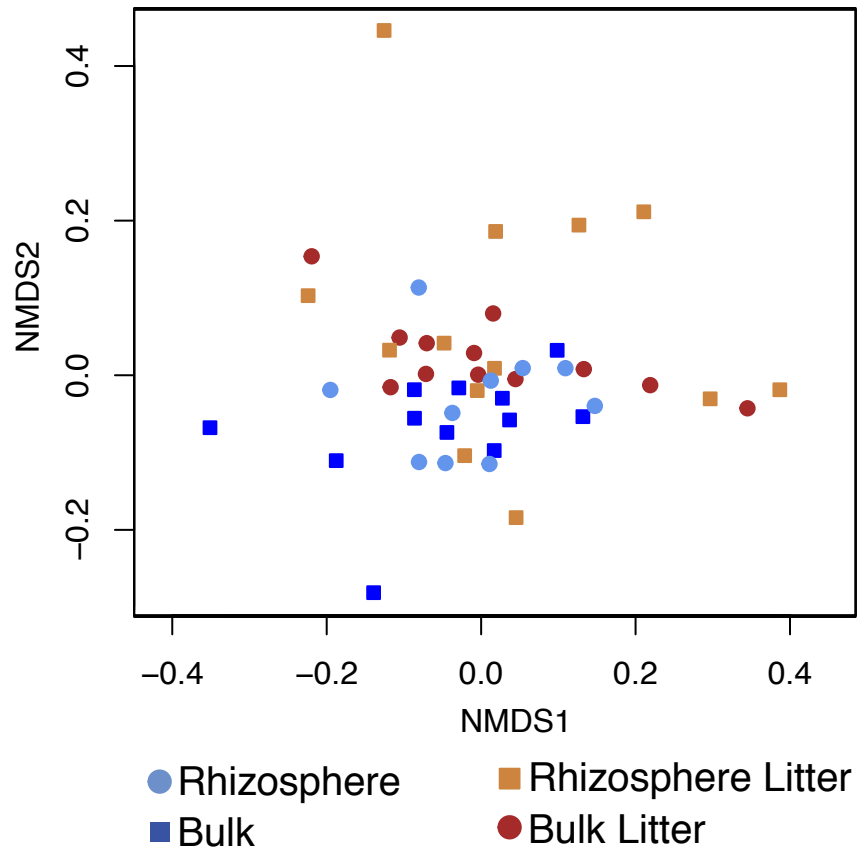

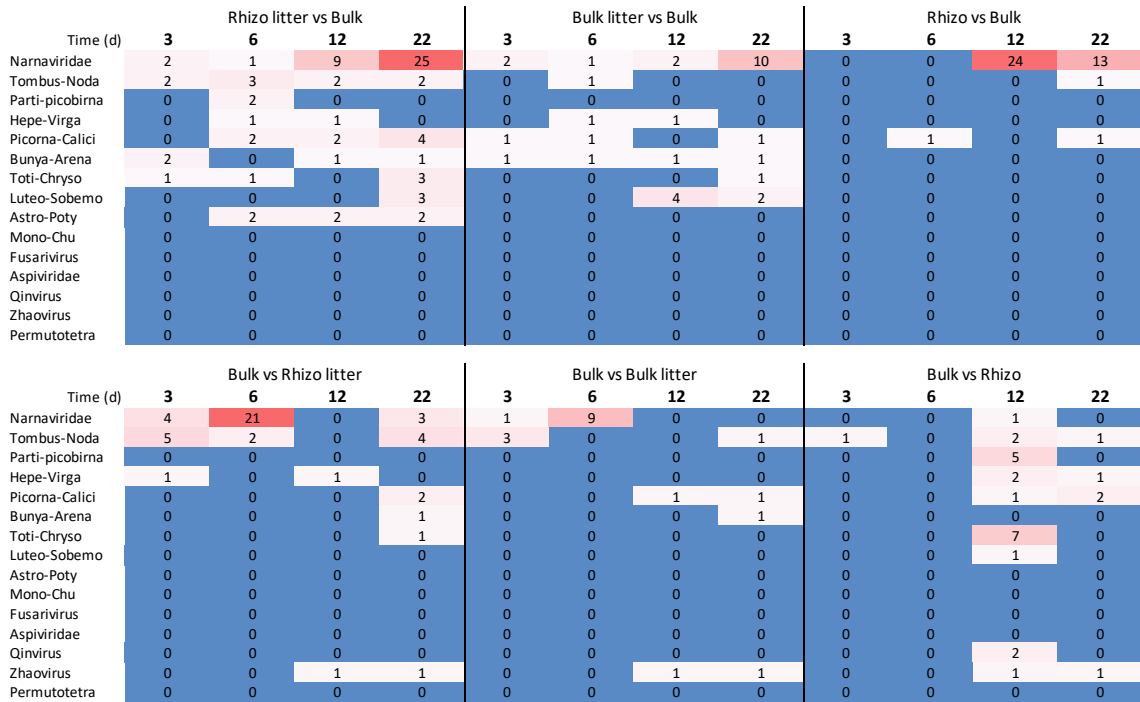

**Supplementary Figure 7.** Time-series heatmap representing the enriched clades of eukaryote viruses. The enrichment was determined by comparing the viral transcript level of from the treatments against the bulk soil (A) and the bulk soil against the treatments (B). Red indicates a higher number of identified significant enrichments and blue indicates no species were significantly enriched. The clades of viruses are ordered by the total number of sequences identified.



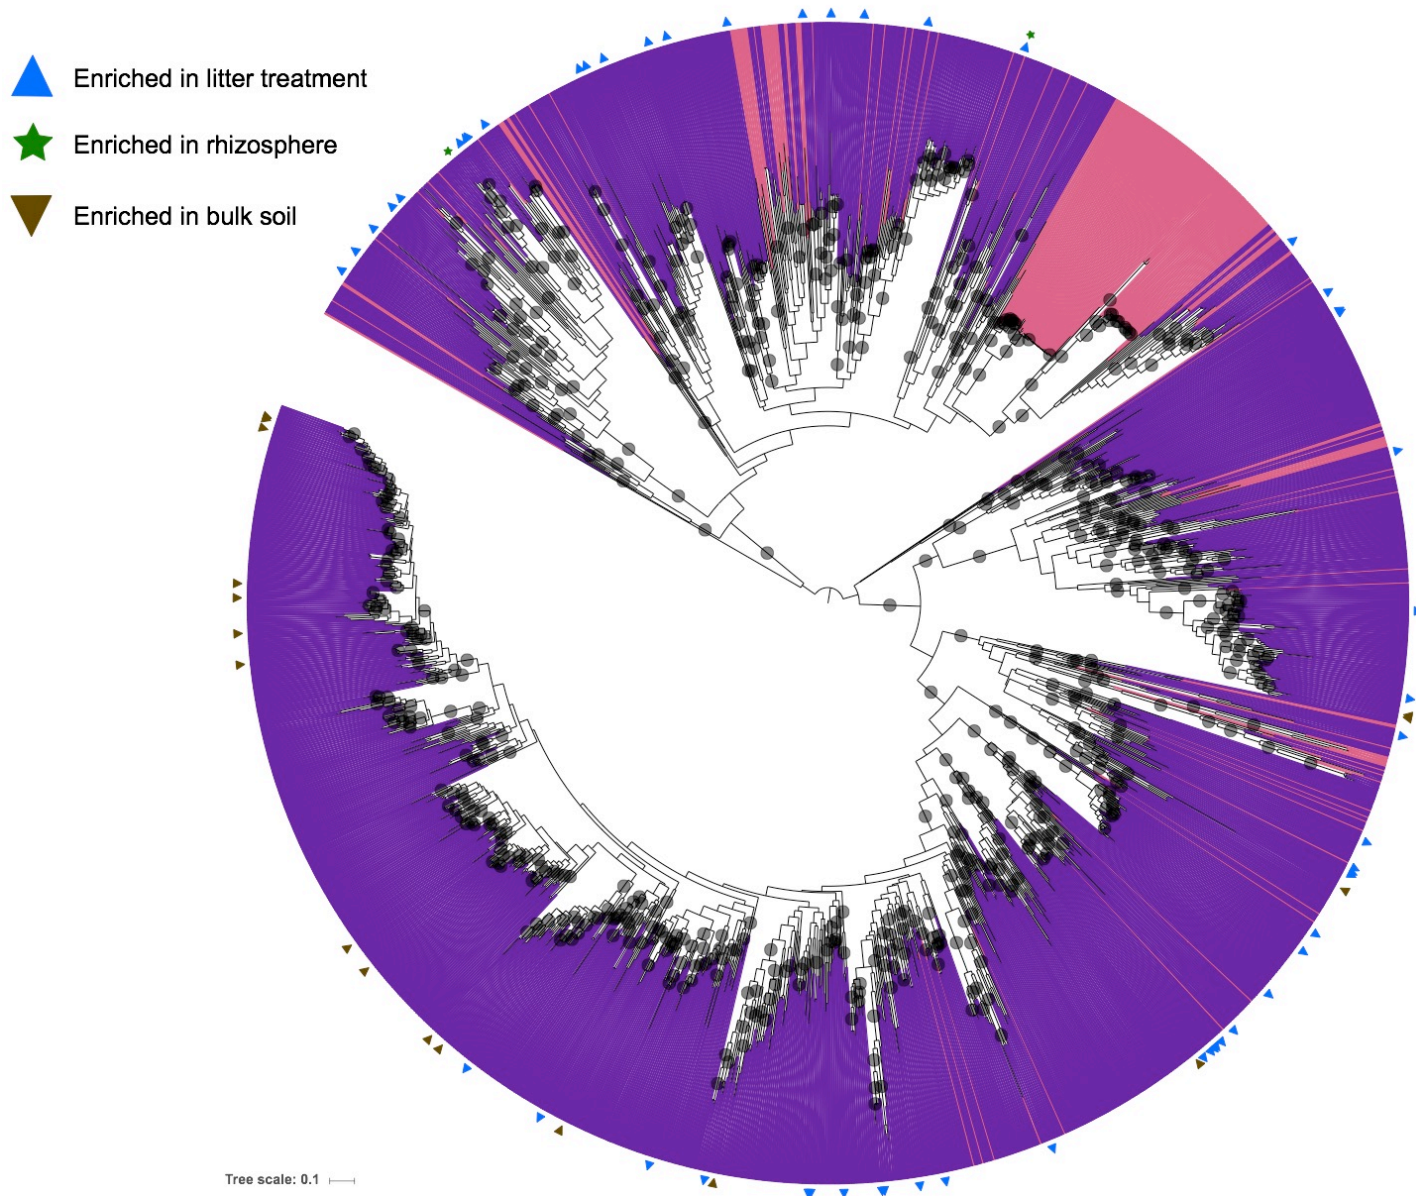

**Supplementary Figure 8.** Statistically enriched *Leviviridae* in the treatments. Blue triangles represent *Leviviridae* that were enriched in the treatments samples (rhizosphere and litter, bulk and litter) compared to unamended bulk soil. Green stars mark viral strains that were enriched in the unamended rhizosphere compared to bulk soil. And brown triangles represent *Leviviridae* enriched in bulk soil when compared to the treatment samples.

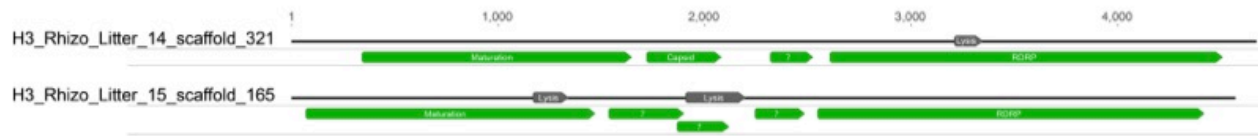

**Supplementary Figure 9.** Representative novel genome architectures identified in near complete *Leviviridae* genomes.

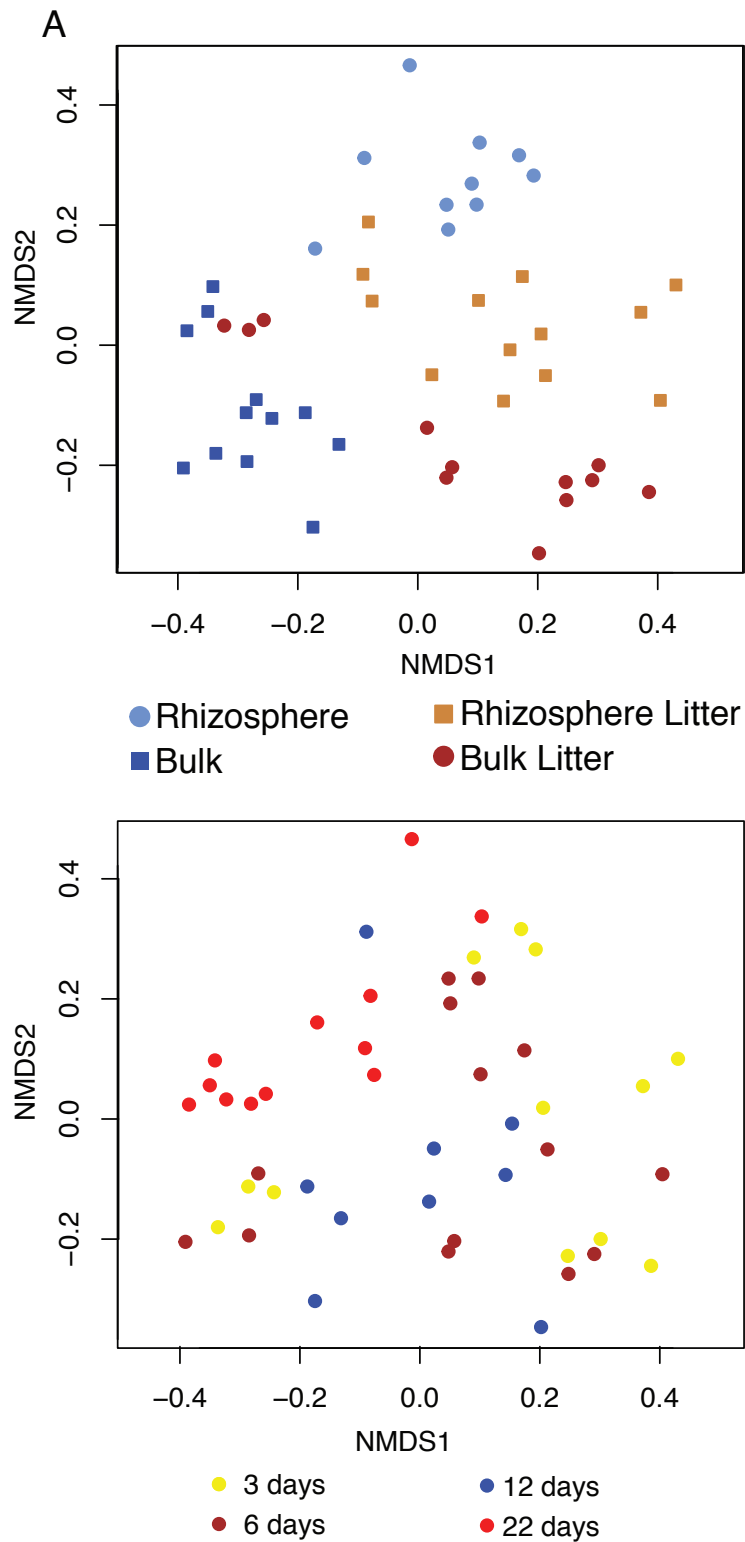

**Supplementary Figure 10.** Nonmetric multidimensional scaling ordination of Proteobacteria community colored by treatment (A) and harvest day (B).

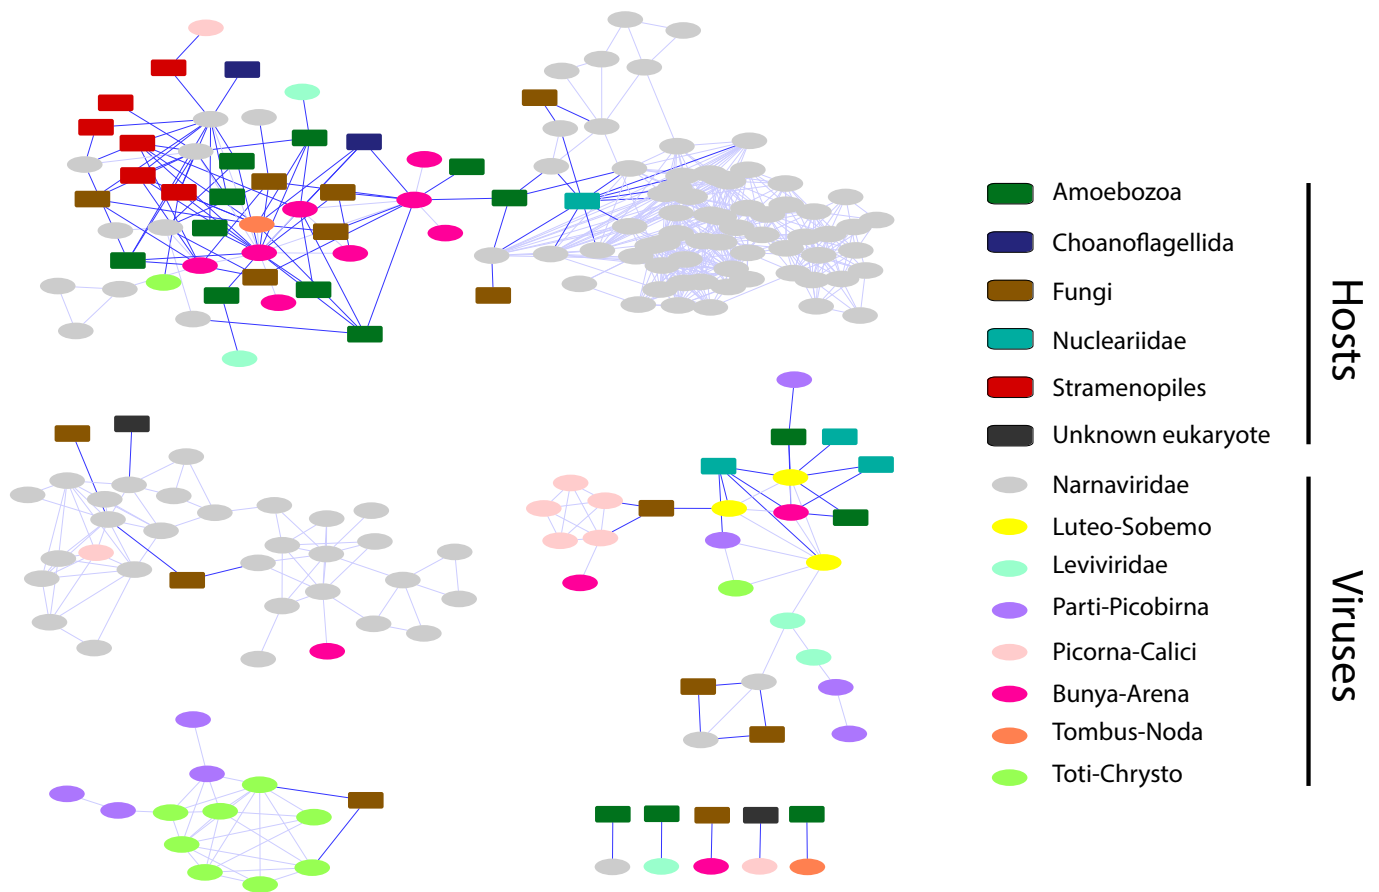

**Supplementary Figure 11.** Co-correlation network analysis of all RNA viruses and hosts. Presented are the clusters after stringent filtering (see Methods). Gray lines indicate virus to virus edges and blue lines indicate host to virus edges.

**Supplementary Data 1-6.** Available online at the following link:

[https://figshare.com/projects/Metatranscriptomic\\_reconstruction\\_reveals\\_RNA\\_viruses\\_with\\_the\\_potential\\_to\\_shape\\_carbon\\_cycling\\_in\\_soil/63722](https://figshare.com/projects/Metatranscriptomic_reconstruction_reveals_RNA_viruses_with_the_potential_to_shape_carbon_cycling_in_soil/63722)

**Supplementary Data 1.** Tree files for each viral clade

**Supplementary Data 2.** Eukaryotic COX1 tree

**Supplementary Data 3.** 18S rRNA tree

**Supplementary Data 4.** Proteobacteria rpS3 tree

**Supplementary Data 5.** Alignments of RdRp sequences

**Supplementary Data 6.** Hmm for Cystoviridae RdRp
